# Supplementary material for: In situ exsolved CoFe alloys over perovskite toward enhanced ammonia synthesis
Source: Royal Society of Chemistry journal article supplement (doi:10.1039/d4nj01662a), 2024-01-01
Supplement: d4nj01662a1.pdf [file d4nj01662a1.pdf]

## Supplementary Information

### In-situ exsolved CoFe alloys over perovskite toward enhanced ammonia synthesis

Yufeng Du<sup>a,b,c</sup>, Xiang Su<sup>a,b,c</sup>, Xin Wang<sup>\*,a</sup>, Lingting Ye<sup>\*,b,c</sup>, Kui Xie<sup>\*,b,c</sup>

<sup>a</sup> College of Materials Science and Engineering, Fuzhou University, Fuzhou 350108, China.

<sup>b</sup> Key Laboratory of Design & Assembly of Functional Nanostructures, Fujian Institute of Research on the Structure of Matter, Chinese Academy of Sciences, Fuzhou 350002, China.

<sup>c</sup> Fujian College, University of Chinese Academy of Sciences, Fuzhou, Fujian 350108, China.

\* E-mail: [xinxinwx@fzu.edu.cn](mailto:xinxinwx@fzu.edu.cn); [ltye@fjirsm.ac.cn](mailto:ltye@fjirsm.ac.cn); [kxie@fjirsm.ac.cn](mailto:kxie@fjirsm.ac.cn)

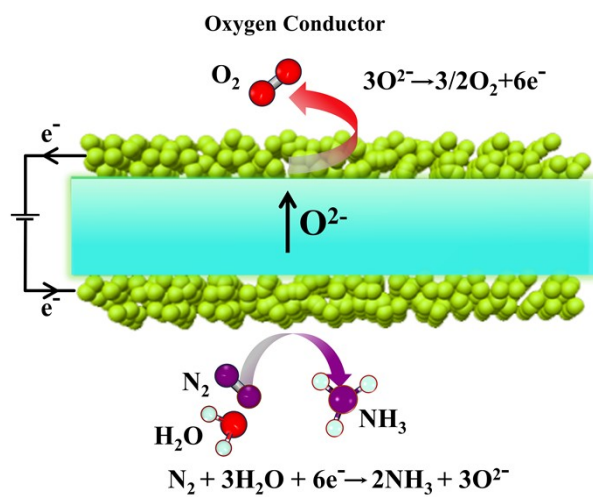

**Fig. S1** Schematic graph of ammonia synthesis by electrocatalytic NRR via SOECs

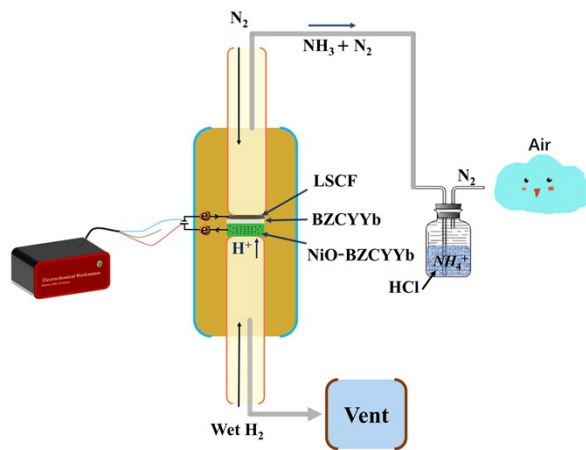

Fig. S2 Schematic diagram of the cell unit.

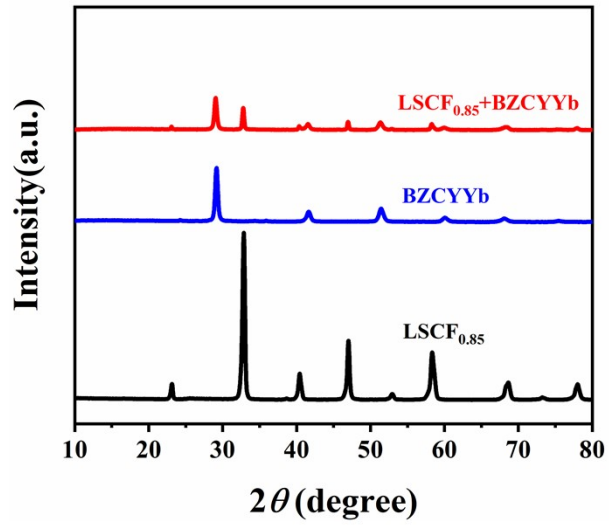

Fig. S3 XRD patterns of LSCF<sub>0.85</sub>, BZCYYb, and LSCF<sub>0.85</sub>-BZCYYb (1:1 mass ratio).

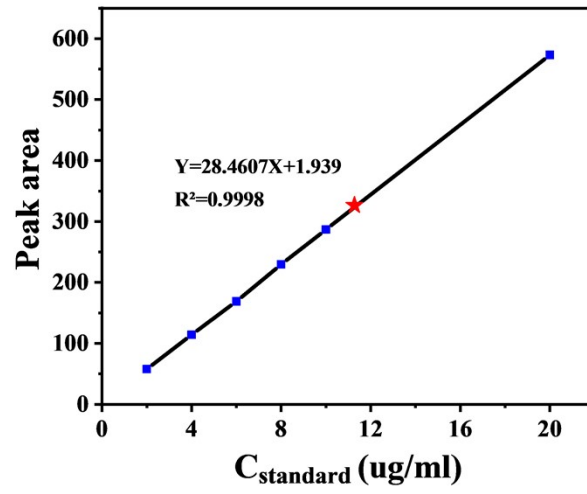

Fig. S4 Standard curve of ammonia nitrogen

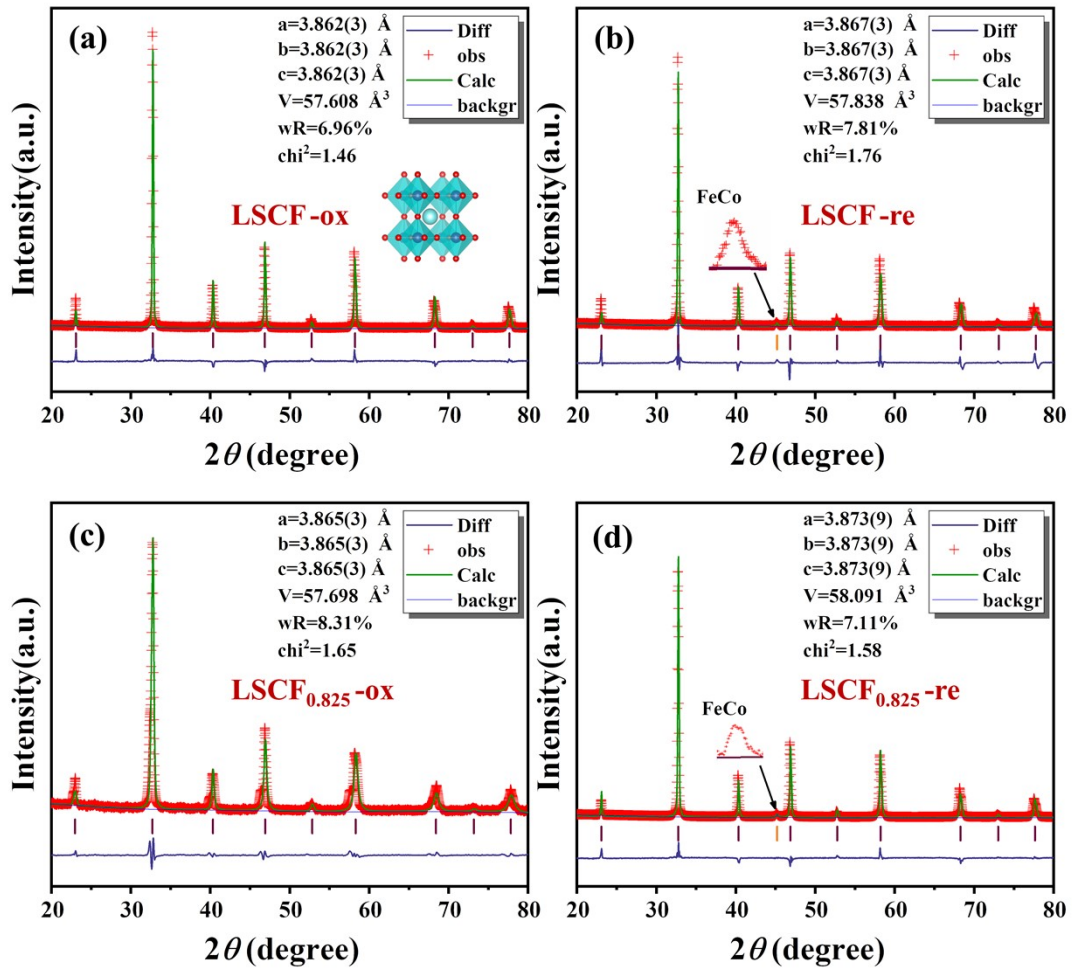

**Fig. S5** XRD rietveld refinement patterns of the (a) oxidized and (b) reduced LSCF; (c) oxidized and (d) reduced of LSCF<sub>0.825</sub>, respectively.

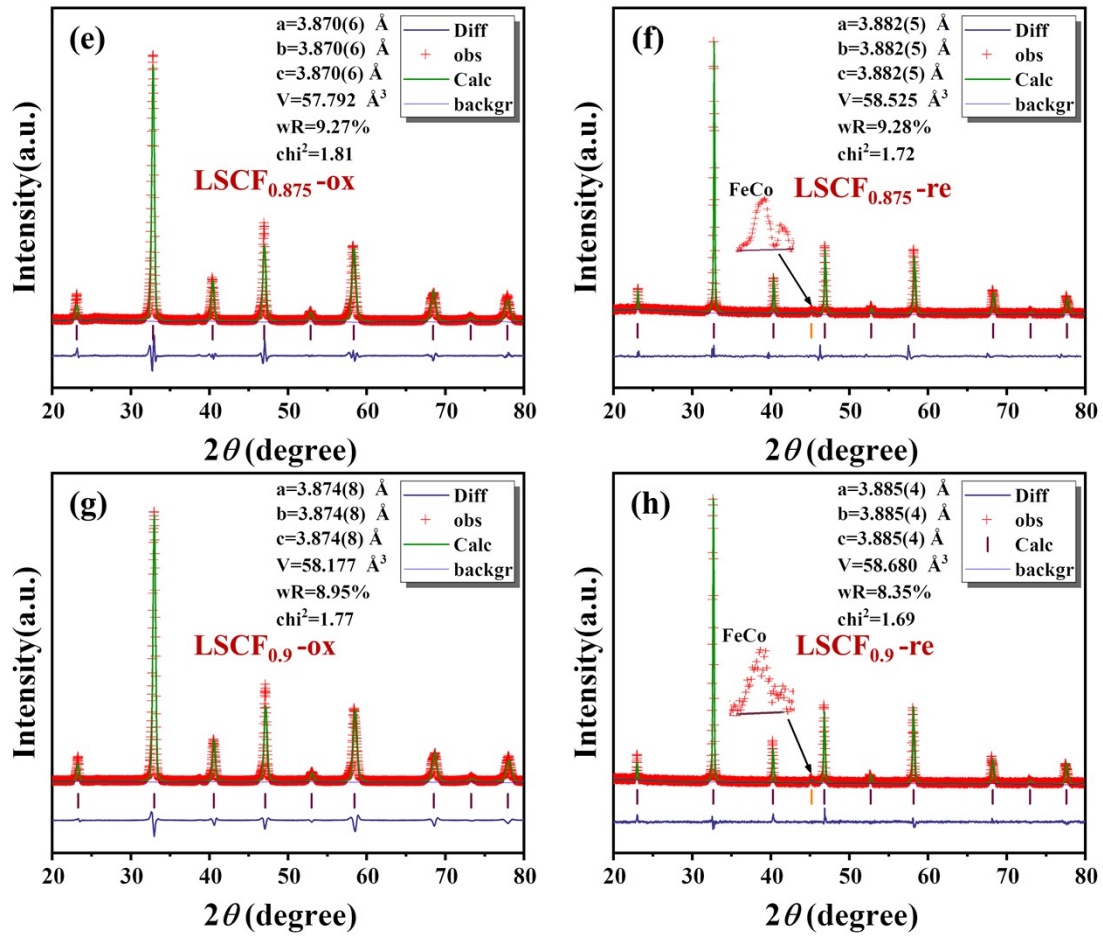

Fig. S6 XRD rietveld refinement patterns of the (e) oxidized and (f) reduced of LSCF<sub>0.875</sub>; (g) oxidized and (h) reduced of LSCF<sub>0.9</sub>, respectively.

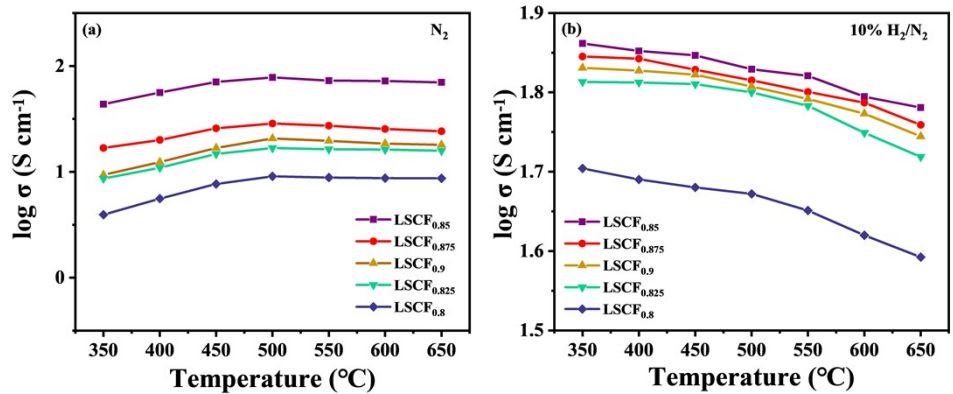

Fig. S7 The conductivity of LSCF<sub>0.8+x</sub> in (a) pure N<sub>2</sub> atmosphere (b) 10% H<sub>2</sub>/N<sub>2</sub> atmosphere.



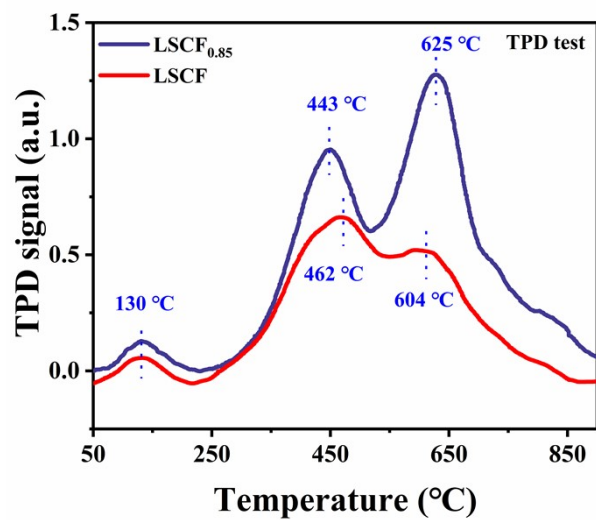

Fig. S8 The N<sub>2</sub>-TPD curves of LSCF and LSCF<sub>0.85</sub> powder

**Table S1** Different valence peaks and atomic ratios of Fe and Co

| Sample              | Ions             | Oxidation State |            | Reduction State |            |
|---------------------|------------------|-----------------|------------|-----------------|------------|
|                     |                  | Atomic Ratio(%) | Energy(eV) | Atomic Ratio(%) | Energy(eV) |
| Fe2p <sub>3/2</sub> | Fe <sup>0</sup>  |                 |            | 12.51           | 706.08     |
|                     | Fe <sup>2+</sup> | 37.40           | 709.80     | 29.34           | 709.92     |
|                     | Fe <sup>3+</sup> | 32.74           | 712.09     | 18.27           | 712.80     |
| Fe2p <sub>1/2</sub> | Fe <sup>0</sup>  |                 |            | 10.42           | 721.53     |
|                     | Fe <sup>2+</sup> | 15.42           | 723.10     | 21.24           | 723.81     |
|                     | Fe <sup>3+</sup> | 14.44           | 724.89     | 8.22            | 725.60     |
| Co2p <sub>3/2</sub> | Co <sup>0</sup>  |                 |            | 12.30           | 777.41     |
|                     | Co <sup>2+</sup> | 50.18           | 780.27     | 31.71           | 779.82     |
|                     | Co <sup>3+</sup> | 25.06           | 783.37     | 23.97           | 782.09     |
| Co2p <sub>1/2</sub> | Co <sup>0</sup>  |                 |            | 8.37            | 792.86     |
|                     | Co <sup>2+</sup> | 15.27           | 795.29     | 15.44           | 795.27     |
|                     | Co <sup>3+</sup> | 9.49            | 797.56     | 8.21            | 798.42     |
